# Supplementary material for: Mutation-specific CAR T cells as precision therapy for IGLV3-21R110 expressing high-risk chronic lymphocytic leukemia
Source: PubMed Central journal article supplement (PMC10837166; doi:10.1038/s41467-024-45378-w), 2024-02-02
Supplement: 41467_2024_45378_MOESM1_ESM.pdf [file 41467_2024_45378_MOESM1_ESM.pdf]

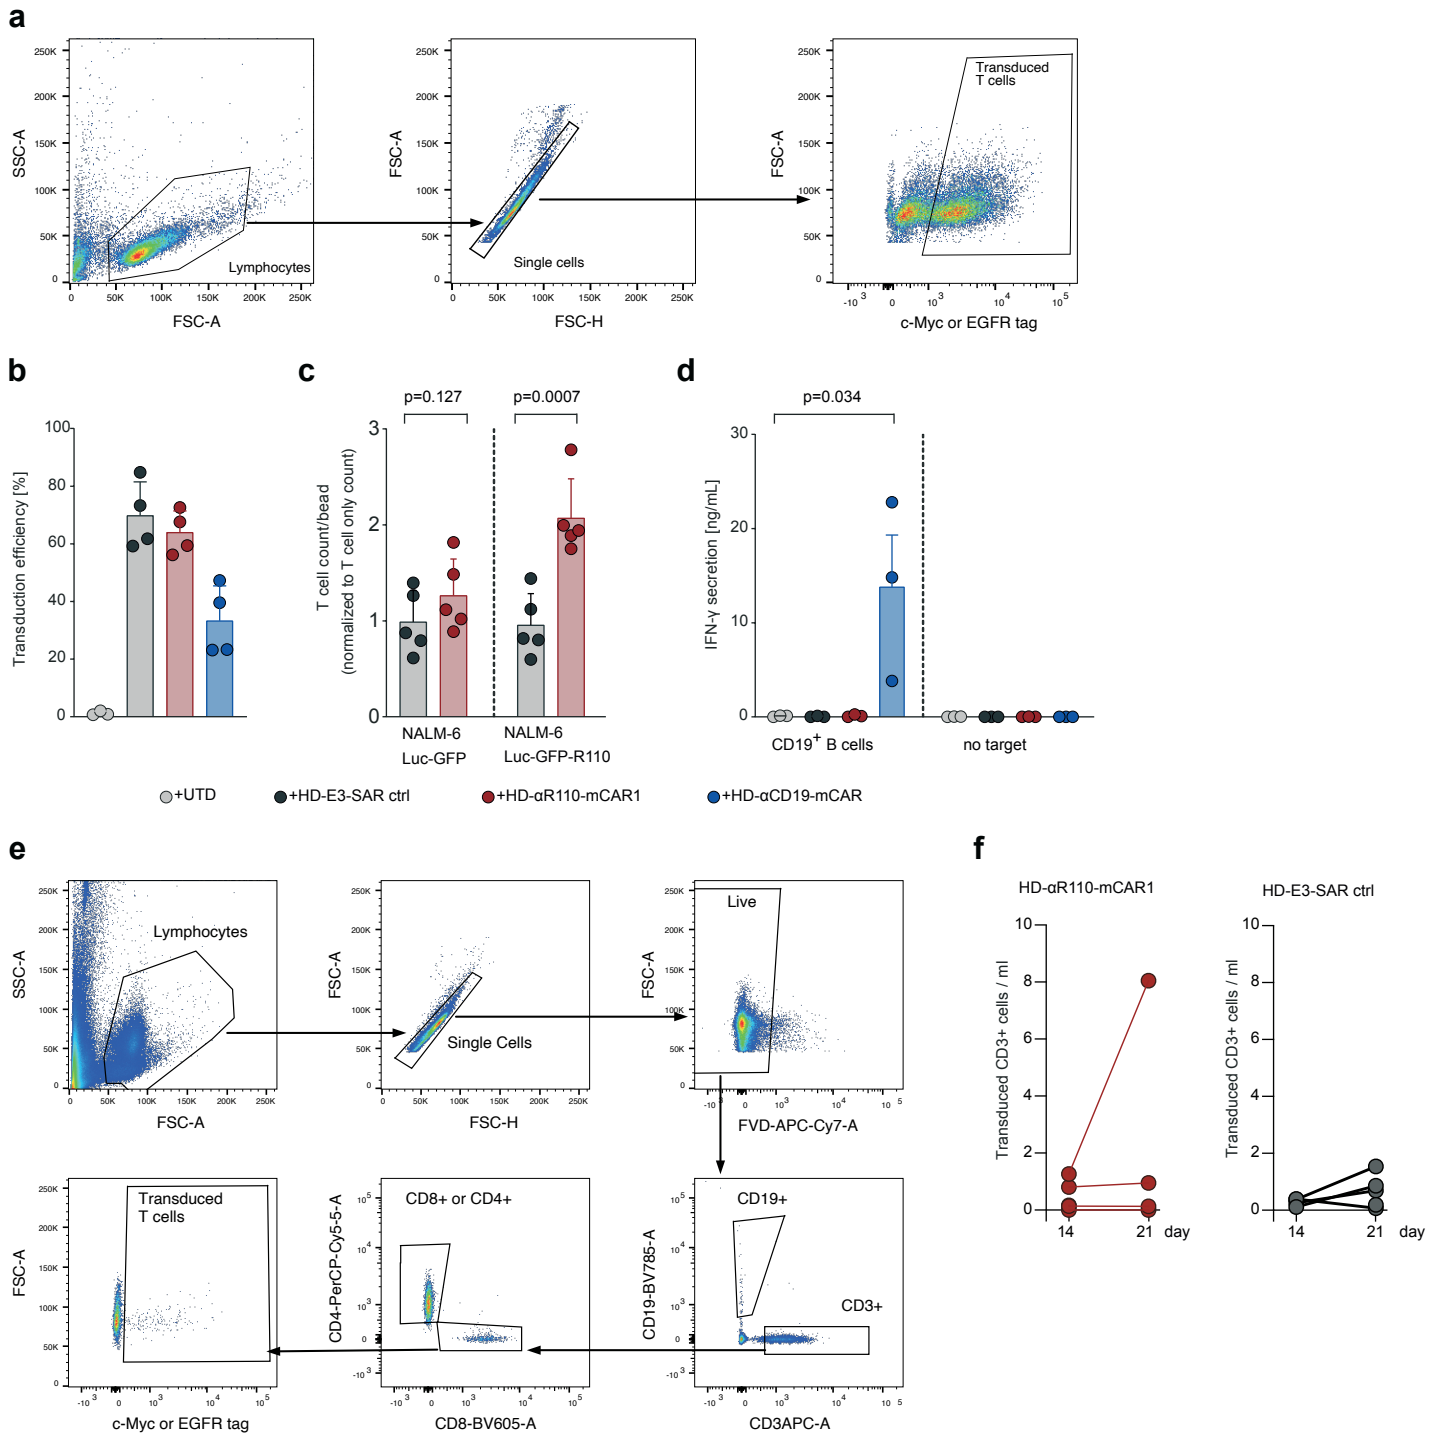

**Supplementary Fig. 1 Generation and validation of a murine anti-IGLV3-21<sup>R110</sup> CAR construct.** **a** Gating strategy for the quantification of the transduction efficiency of the murine CAR T construct. T cells with surface expression of co-delivered c-Myc tag or EGFR were identified as CAR T cells. **b** Efficiency of the retroviral transduction of the murine CAR construct into human T cells. Bars represent mean of n=4 independent experiments. **c** Expansion of HD- $\alpha$ R110-mCAR1 T cells in co-culture with NALM-6 Luc-R110. CD3<sup>+</sup> T cell count per counting bead was assessed by flow cytometry. Counts were normalized to T cells grown as monoculture. Statistics: one-tailed unpaired t test. **d** Quantification of IFN- $\gamma$  secretion in cell culture supernatants after 48h co-culture of CD19<sup>+</sup> B cells with indicated CAR T cells. Statistics: one-tailed unpaired t test for =3 independent experiments. **e** Gating strategy for longitudinal tracking of i.v. injected HD- $\alpha$ R110-mCAR1 and E3-SAR ctrl CAR T cells (= transduced CD3<sup>+</sup>EGFR<sup>+</sup> T cells) in xenograft models. **f** Tracking of HD- $\alpha$ R110-mCAR1 (n=5) and E3-SAR ctrl (n=5) CAR T cells in the blood of individual mice as quantified by flow cytometry.

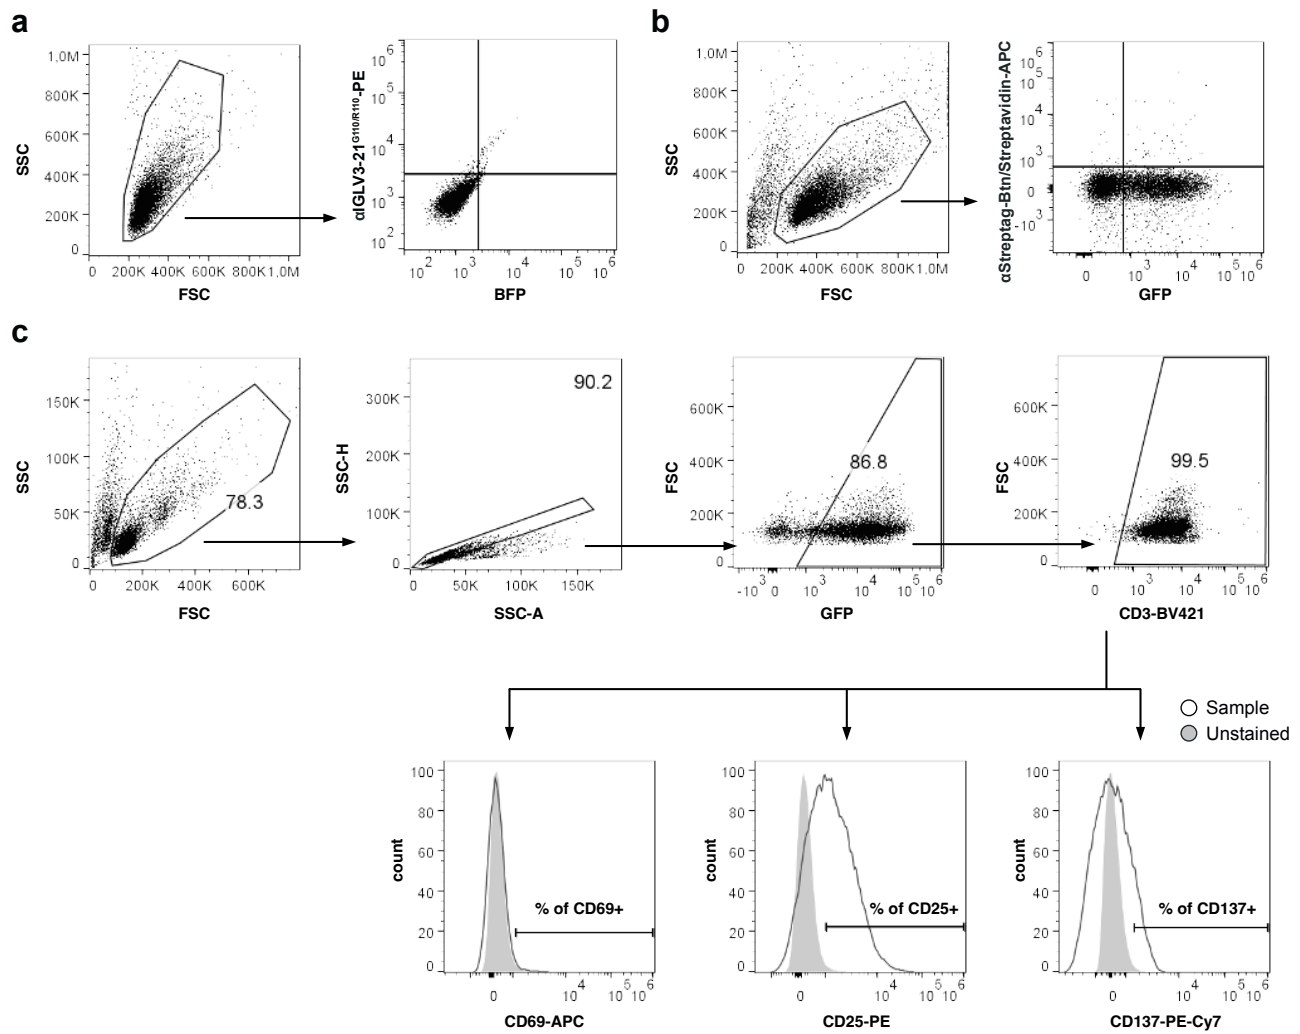

**Supplementary Fig. 2 Specificity validation of the anti-IGLV3-21<sup>R110</sup> CAR construct.** **a** Gating strategy for validation of NALM-6-G110 and -R110 cell models. **b** Gating strategy for determining CAR T transduction efficiency. CAR T cells were identified by co-expression of an Strep-tag cloned between the scFv and the CD8 hinge in the CAR backbone and a co-delivered GFP. btn, biotin. **c** Gating strategy to determine surface expression of activation markers on CAR T cells after co-culture with target cells as presented in Fig. 2h-j.

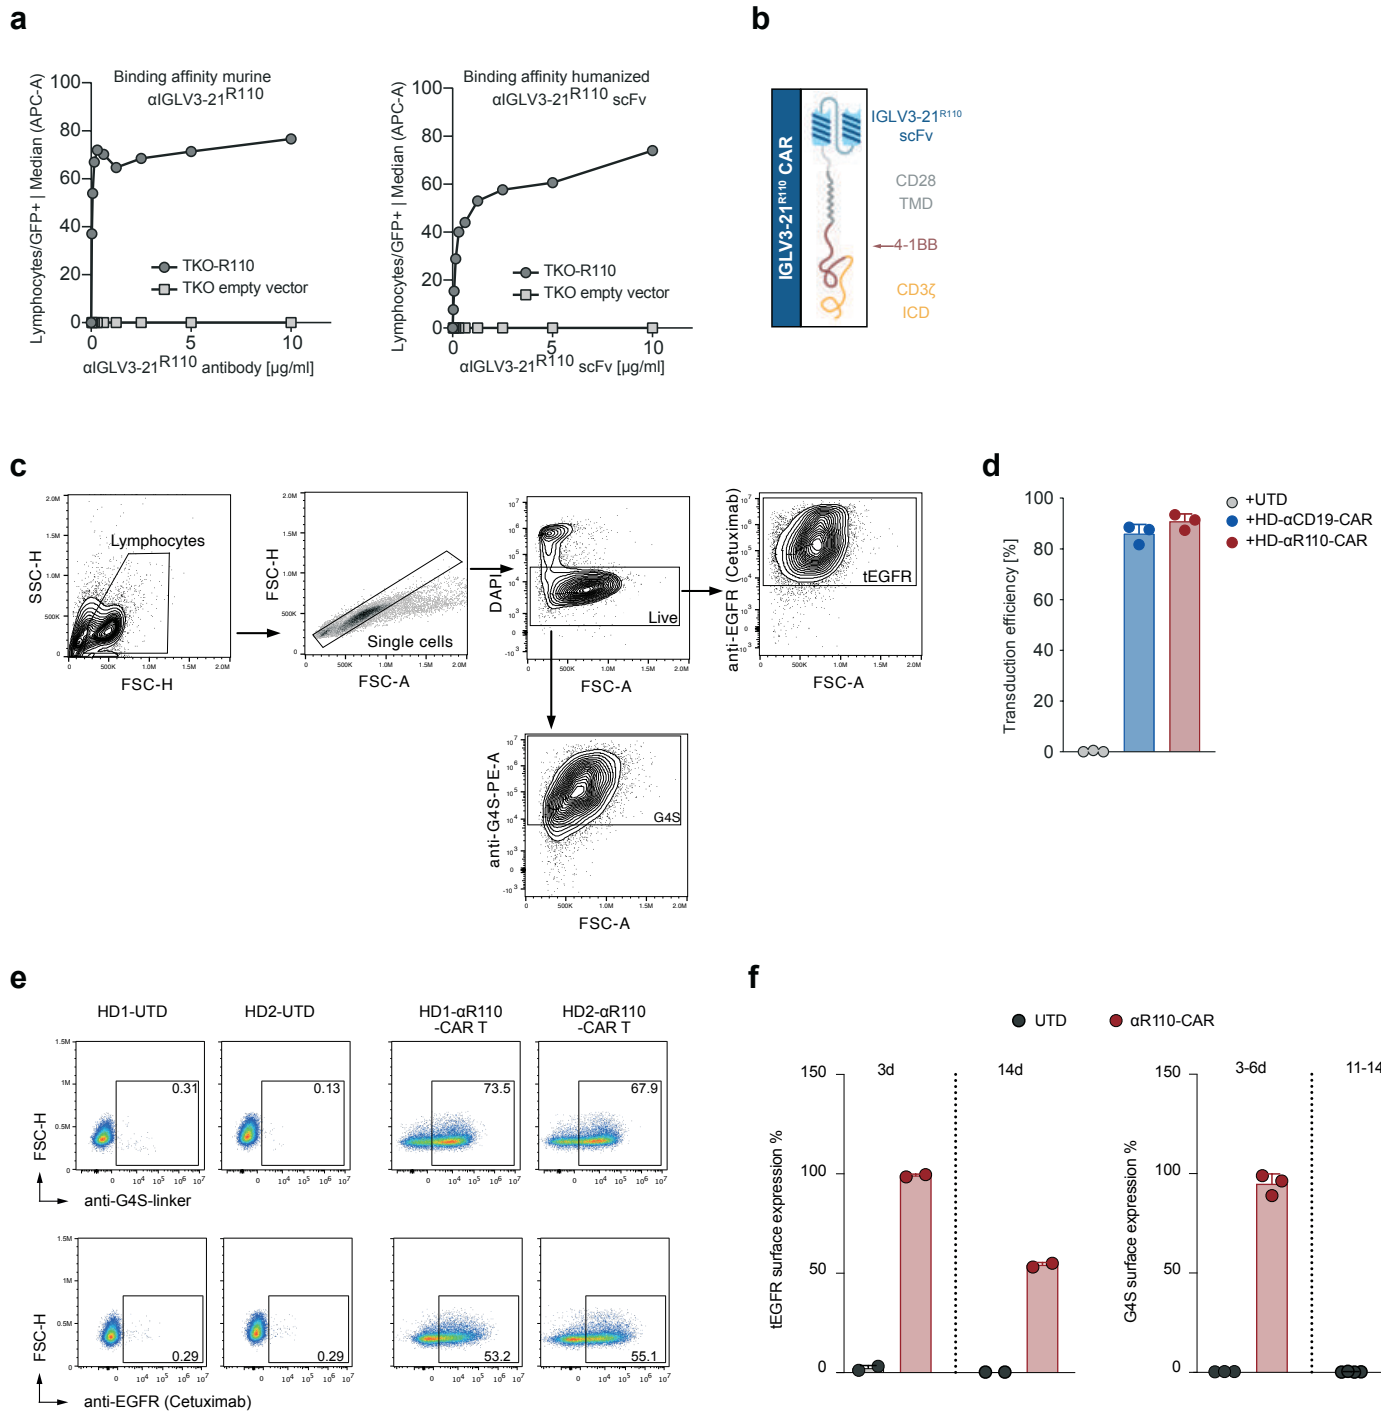

**Supplementary Fig. 3 Humanization of the anti-IGLV3-21<sup>R110</sup> CAR construct and cloning into a minimal-sized plasmid.** **a.** Determination of median ( $n=3$  independent samples) binding affinities of the murine anti-IGLV3-21<sup>R110</sup> antibody or the corresponding humanized scFv construct. Serial dilutions were incubated with TKO cells expressing the IGLV3-21<sup>R110</sup> antigen and binding intensity was quantified using flow cytometry. **b.** Schematic representation of the humanized scFv fragment cloned into a 2<sup>nd</sup> generation CAR backbone with 4-1BB-CD3 $\zeta$  costimulatory domains. Created with [BioRender.com](https://BioRender.com). **c.** Gating strategy for the quantification of the transduction efficiency of the humanized CAR T constructs. T cells with surface expression of the G4S linker and the co-delivered truncated (t)EGFR were identified as CAR T cells. **d.** Efficiency of the lentiviral transduction of the humanized CAR construct into primary human T cells. Bars represent the mean  $\pm$  SD of  $n=3$  independent experiments. **e-f.** Efficiency of transposon-based CAR T cell generation from healthy (HD) T cells. Representative gating of G4S and EGFR surface expression (**e**) and quantification after 3-6 ( $n=2$  for EGFR,  $n=3$  for G4S) and 11-14 days (**d**) ( $n=2$  for EGFR,  $n=5$  for G4S) post-electroporation from indicated  $n$  independent experiments (**f**). Source data are provided as source data file.

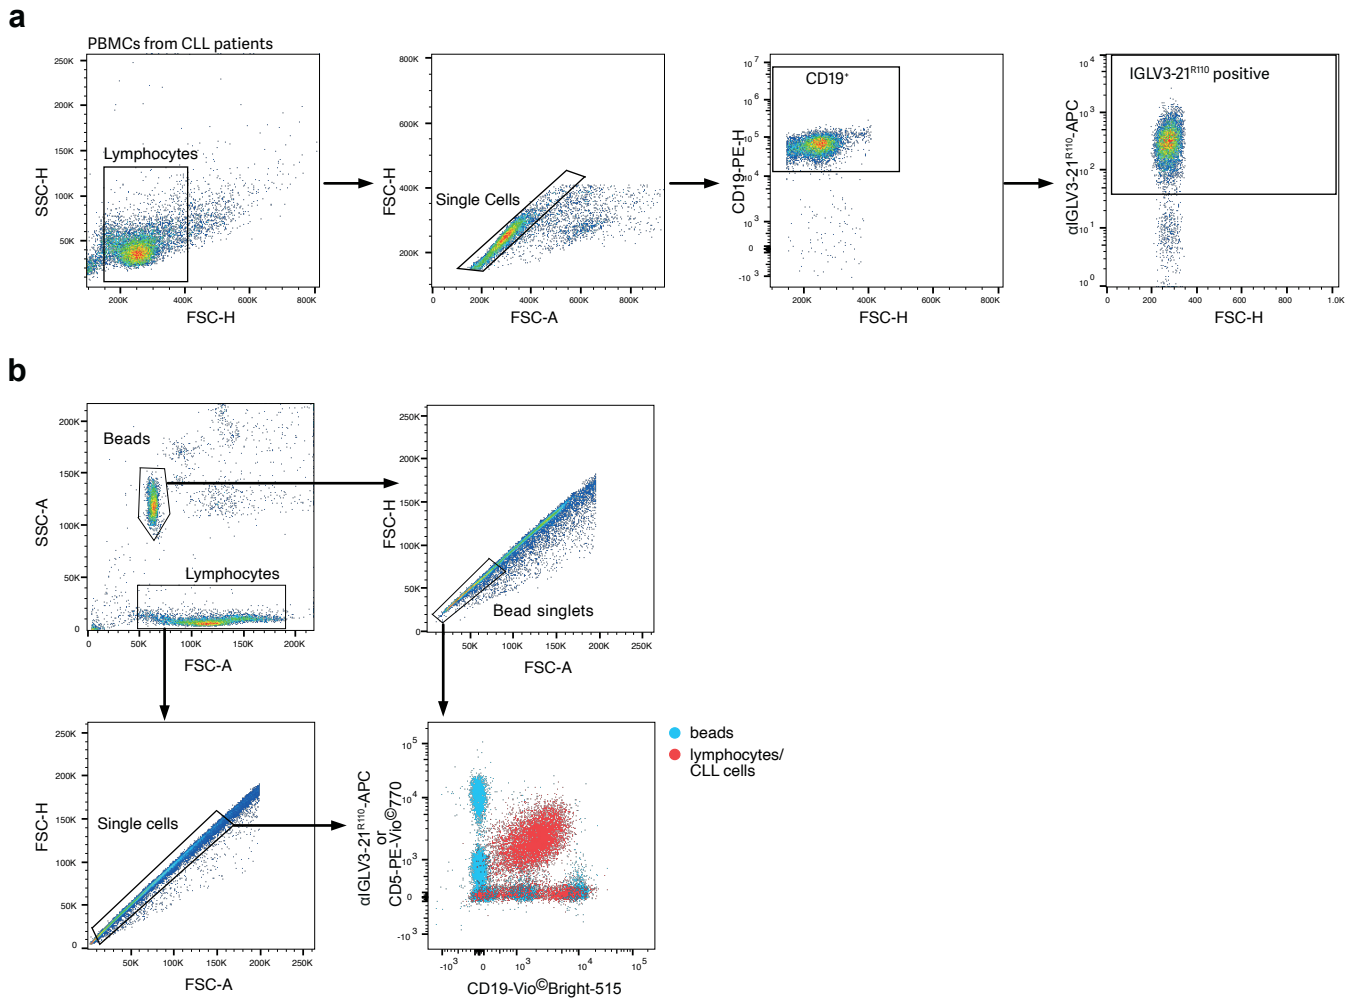

**Supplementary Fig. 4 Screening of CLL patients for IGLV3-21<sup>R110</sup> surface expression.** **a** Gating strategy for detection of IGLV3-21<sup>R110</sup> surface expression in CLL patients using the murine anti-IGLV3-21<sup>R110</sup> antibody. **b** Gating strategy for bead-based detection of IGLV3-21<sup>R110</sup> surface expression in CLL patients. Positive cases were identified as CD19<sup>+</sup>CD5<sup>+</sup>IGLV3-21<sup>R110</sup>+

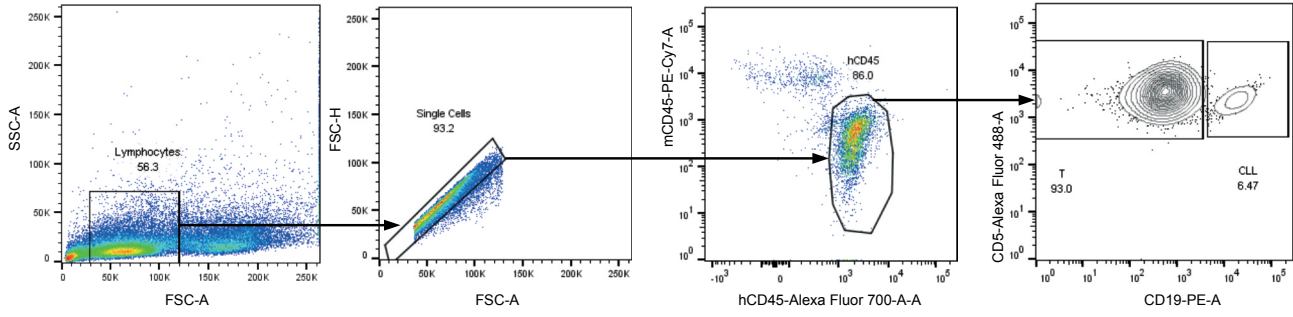

**Supplementary Fig. 5 Gating strategies for the detection of human T cells and engrafted CLL cells in a patient-derived xenograft mouse model for CLL.** Human lymphocytes were quantified after i.v. co-injection of T cells and CLL cells into NSG mice followed by CAR T treatment 10 days later. Single human lymphocytes were identified as mCD45-hCD45+. Within this population, CD5+CD19+ cells were identified as CLL cells, CD5-CD19+ cells as T cells.

**a** NSG model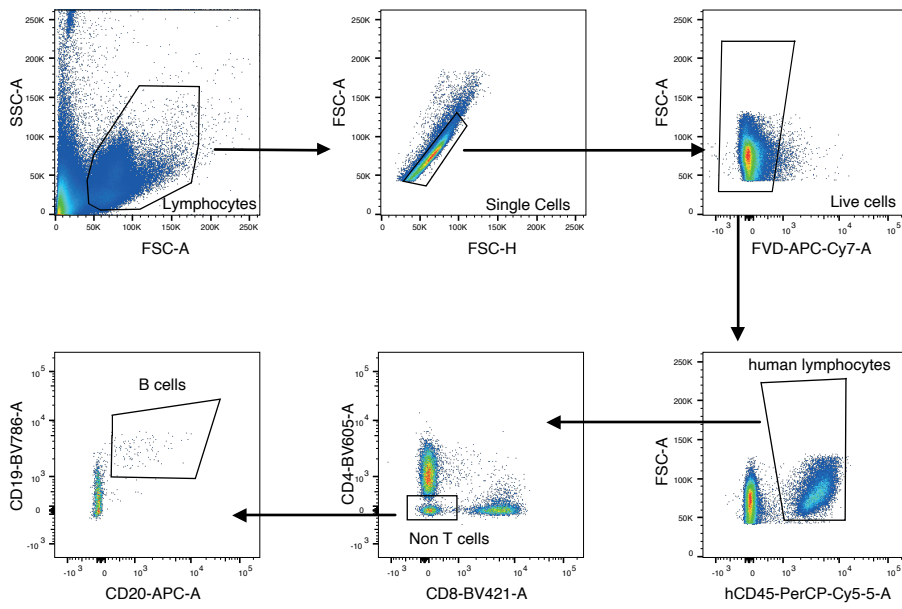**b** NFA2 model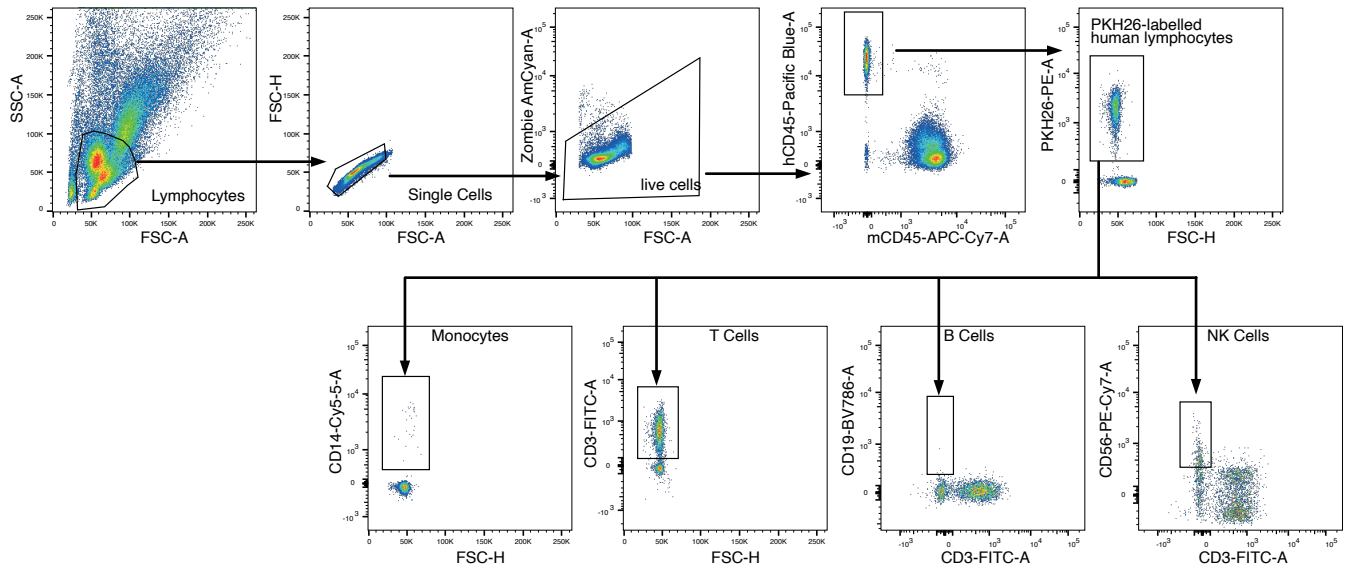

**Supplementary Fig. 6 Gating strategies for the detection of human lymphocytes in humanized mouse models.** **a** Gating strategy for quantification of B cells in the blood of NSG mice after *i. v.* injection of human PBMCs followed by CAR T treatment. Single live human B cells were identified as hCD45+CD4-CD8-CD19+CD20+. **b** Gating strategy for quantification of B cells in the peritoneal lavage after *i. p.* injection of PKH26-labelled human PBMCs and CAR T cells into NFA2 mice. Human PBMC subpopulations were identified as hCD45+PKH26+CD3-CD19+ (B cells), hCD45+PKH26+CD3-CD56+ (NK cells), hCD45+PKH26+CD3\* (T cells) and hCD45+PKH26+CD14+ (Monocytes).

**Supplementary table 1: ScFv sequences of  $\alpha$ R110-CAR constructs.**

| Name              | VH                                                                                                                                              | VL                                                                                                                                | Reference                                             |
|-------------------|-------------------------------------------------------------------------------------------------------------------------------------------------|-----------------------------------------------------------------------------------------------------------------------------------|-------------------------------------------------------|
| murine<br>ScFv    | QVQLQQSGPGLVQPSQSL<br>ITCTVSGFSLTSYGIHWVR<br>QSPGKGLEWLGVIWRGGG<br>TDSNAAFMSRLSITKDNSK<br>SQVFFKMNSLQADDTAIY<br>YCARSRYDEEESMNYWG<br>QGTSVTVSS  | QIVLTQSPASLSASVGETVTI<br>TCRASGNIHSYLAWEYQQKQ<br>GKSPQLLVYNAKTLADGVP<br>SRFSGSGSGTQYSLKINSLQP<br>EDFGSYQCQHFWNTPPTEFG<br>AGTKLELK | Publication Number:<br>WO/2019/008129                 |
| humanized<br>ScFv | QVQLQESGPGLVKPSETLS<br>LTCTVSGFSLTSYGIHWIR<br>QSPGRGLEWIGVIWRGGG<br>TDSNAAFMSRITISRDTSKT<br>QVSLKLGSVTAADTAIYYC<br>ARSRYDEEESMNYWGQGT<br>SVTVSS | EIVLTQSPSSLSASVGDSTI<br>TCRASGNIHSYLAWEYQQKP<br>GKAPKLLIYNAKTLADGVPS<br>RFSGSGSGTQYTLTISSLQPE<br>DFATYYQCQHFWNTPPTEFGA<br>GTKLELK | Application Number:<br>EP22156205.1 /<br>EP22186810.2 |
